# Supplementary material for: Health Care Utilization for Common Shoulder Disorders: Analysis of the 2010–2019 National Patient Sample Data from the Health Insurance Review and Assessment Service in Korea
Source: MDPI journal article supplement (doi:10.3390/medicina60050744), 2024-04-29
Supplement: s1 [file s1]

**Supplement Table S1.** General medical service use for patients with shoulder diseases in Korea.

|                                     | 2010      | 2011      | 2012      | 2013      | 2014      | 2015      | 2016      | 2017      | 2018       | 2019       |
|-------------------------------------|-----------|-----------|-----------|-----------|-----------|-----------|-----------|-----------|------------|------------|
| <b>Number of patients</b>           | 35,798    | 35,648    | 36,823    | 37,852    | 37,956    | 38,120    | 38,861    | 39,593    | 41,400     | 42,558     |
| AC                                  | 23,854    | 22,369    | 21,729    | 21,337    | 20,507    | 19,741    | 19,206    | 18,978    | 19,240     | 19,346     |
| IS                                  | 4,666     | 5,501     | 6,607     | 7,456     | 7,612     | 8,035     | 8,675     | 8,983     | 9,340      | 9,673      |
| RCST                                | 11,390    | 12,220    | 13,628    | 14,601    | 15,355    | 16,023    | 16,735    | 17,683    | 19,097     | 19,994     |
| <b>Total claims</b>                 | 182,746   | 183,150   | 201,408   | 209,085   | 209,140   | 207,823   | 206,459   | 210,732   | 216,100    | 224,377    |
| AC                                  | 122,821   | 114,141   | 112,489   | 109,946   | 106,921   | 100,781   | 95,413    | 92,232    | 92,302     | 92,515     |
| IS                                  | 16,089    | 19,121    | 25,216    | 28,585    | 28,437    | 29,503    | 32,060    | 32,152    | 33,655     | 35,093     |
| RCST                                | 43,836    | 49,888    | 63,703    | 70,554    | 73,782    | 77,539    | 78,986    | 86,348    | 90,143     | 96,769     |
| <b>Total expenditure†</b>           | 5,485,196 | 6,528,318 | 7,003,404 | 8,158,615 | 8,570,579 | 8,486,077 | 8,593,962 | 9,607,591 | 10,875,282 | 11,522,543 |
| AC                                  | 2,440,371 | 2,493,999 | 2,346,401 | 2,508,789 | 2,645,057 | 2,426,660 | 2,345,948 | 2,426,024 | 2,699,556  | 2,727,445  |
| IS                                  | 636,430   | 888,134   | 1,025,967 | 1,138,625 | 1,282,235 | 1,266,203 | 1,218,521 | 1,343,810 | 1,491,269  | 1,486,115  |
| RCST                                | 2,408,395 | 3,146,184 | 3,631,036 | 4,511,201 | 4,643,288 | 4,793,214 | 5,029,494 | 5,837,757 | 6,684,457  | 7,308,983  |
| <b>Avg. expenditure per patient</b> | 153.2     | 183.1     | 190.2     | 215.5     | 225.8     | 222.6     | 221.2     | 242.7     | 262.7      | 270.8      |
| AC                                  | 102.3     | 111.5     | 108.0     | 117.6     | 129.0     | 122.9     | 122.2     | 127.8     | 140.3      | 141.0      |
| IS                                  | 136.4     | 161.5     | 155.3     | 152.7     | 168.5     | 157.6     | 140.5     | 149.6     | 159.7      | 153.6      |
| RCST                                | 211.5     | 257.5     | 266.4     | 309.0     | 302.4     | 299.2     | 300.5     | 330.1     | 350.0      | 365.6      |
| <b>Avg. expenditure per claim†</b>  | 30.0      | 35.6      | 34.8      | 39.0      | 41.0      | 40.8      | 41.6      | 45.6      | 50.3       | 51.4       |
| AC                                  | 19.9      | 21.9      | 20.9      | 22.8      | 24.7      | 24.1      | 24.6      | 26.3      | 29.3       | 29.5       |
| IS                                  | 39.6      | 46.5      | 40.7      | 39.8      | 45.1      | 42.9      | 38.0      | 41.8      | 44.3       | 42.4       |
| RCST                                | 54.9      | 63.1      | 57.0      | 63.9      | 62.9      | 61.8      | 63.7      | 67.6      | 74.2       | 75.5       |

AC, adhesive capsulitis; IS, impingement syndrome; RCST, rotator cuff syndrome or tear;

**Supplement Table S2.** General medical service use for Adhesive Capsulitis (M750) patients in Korea.

|                            | Adhesive Capsulitis (M750) |               |               |               |               |               |               |               |               |               |
|----------------------------|----------------------------|---------------|---------------|---------------|---------------|---------------|---------------|---------------|---------------|---------------|
|                            | 2010                       | 2011          | 2012          | 2013          | 2014          | 2015          | 2016          | 2017          | 2018          | 2019          |
|                            | N (%)                      | N (%)         | N (%)         | N (%)         | N (%)         | N (%)         | N (%)         | N (%)         | N (%)         | N (%)         |
| <b>Total</b>               | 23,854(100.0)              | 22,369(100.0) | 21,729(100.0) | 21,337(100.0) | 20,507(100.0) | 19,741(100.0) | 19,206(100.0) | 18,978(100.0) | 19,240(100.0) | 19,346(100.0) |
| <b>AGE</b>                 |                            |               |               |               |               |               |               |               |               |               |
| Under 20                   | 177(0.7)                   | 148(0.7)      | 109(0.5)      | 111(0.5)      | 96(0.5)       | 87(0.4)       | 73(0.4)       | 53(0.3)       | 62(0.3)       | 56(0.3)       |
| 20-29                      | 624(2.6)                   | 468(2.1)      | 453(2.1)      | 384(1.8)      | 366(1.8)      | 306(1.6)      | 267(1.4)      | 266(1.4)      | 230(1.2)      | 221(1.1)      |
| 30-39                      | 1,495(6.3)                 | 1,237(5.5)    | 1,084(5.0)    | 999(4.7)      | 939(4.6)      | 793(4.0)      | 781(4.1)      | 675(3.6)      | 669(3.5)      | 561(2.9)      |
| 40-49                      | 4,641(19.5)                | 4,035(18.0)   | 3,675(16.9)   | 3,629(17.0)   | 3,349(16.3)   | 3,148(16.0)   | 3,072(16.0)   | 2,938(15.5)   | 2,954(15.4)   | 2,897(15.0)   |
| 50-59                      | 6,717(28.2)                | 6,455(28.9)   | 6,524(30.0)   | 6,653(31.2)   | 6,405(31.2)   | 6,196(31.4)   | 5,971(31.1)   | 5,874(31.0)   | 5,837(30.3)   | 6,047(31.3)   |
| 60-69                      | 5,699(23.9)                | 5,472(24.5)   | 5,245 (24.1)  | 4,889(22.9)   | 4,667(22.8)   | 4,684(23.7)   | 4,705(24.5)   | 4,805(25.3)   | 5,010(26.0)   | 5,023(26.0)   |
| 70 or older                | 4,501(18.9)                | 4,554(20.4)   | 4,639(21.4)   | 4,672(21.9)   | 4,685(22.9)   | 4,527(22.9)   | 4,337(22.6)   | 4,367(23.0)   | 4,478(23.3)   | 4,541(23.5)   |
| <b>Gender</b>              |                            |               |               |               |               |               |               |               |               |               |
| Male                       | 8,875(37.2)                | 8,319(37.2)   | 8,345(38.4)   | 8,281(38.8)   | 7,873(38.4)   | 7,773(39.4)   | 7,528(39.2)   | 7,600(40.1)   | 7,712(40.1)   | 7,895(40.8)   |
| Female                     | 14,979(62.8)               | 14,050(62.8)  | 13,384(61.6)  | 13,056(61.2)  | 12,634(61.6)  | 11,968(60.6)  | 11,678(60.8)  | 11,378(60.0)  | 11,528(59.9)  | 11,451(59.2)  |
| <b>Type of visit</b>       |                            |               |               |               |               |               |               |               |               |               |
| outpatients                | 23,655(99.2)               | 22,159(99.1)  | 21,473(98.8)  | 21,011(98.5)  | 20,134(98.2)  | 19,330(97.9)  | 18,831(98.1)  | 18,624(98.1)  | 18,820(97.8)  | 18,927(97.8)  |
| inpatients                 | 199(0.8)                   | 210(0.9)      | 256(1.2)      | 326(1.5)      | 373(1.8)      | 411(2.1)      | 375(2.0)      | 354(1.9)      | 420(2.2)      | 419(2.2)      |
| <b>Medical institution</b> |                            |               |               |               |               |               |               |               |               |               |
| Hospital                   | 2,509(10.5)                | 2,704(12.1)   | 2,948(13.6)   | 2,996(14.0)   | 2,964(14.5)   | 3,035(15.4)   | 3,126(16.3)   | 3,136(16.5)   | 3,261(17.0)   | 3,340(17.3)   |
| Clinic                     | 12,956(54.3)               | 13,355(59.7)  | 13,359(61.5)  | 13,210(61.9)  | 12,806(62.5)  | 12,628(64.0)  | 12,771(66.5)  | 13,015(68.6)  | 13,281(69.0)  | 13,520(69.9)  |
| KM hospital                | 166(0.7)                   | 117(0.5)      | 93(0.4)       | 102(0.5)      | 71(0.4)       | 81(0.4)       | 118(0.6)      | 85(0.5)       | 84(0.4)       | 80(0.4)       |
| KM clinic                  | 9,939(41.7)                | 7,687(34.4)   | 6,763(31.1)   | 6,419(30.1)   | 5,956(29.0)   | 5,208(26.4)   | 4,295(22.4)   | 3,787(20.0)   | 3,722(19.4)   | 3,419(17.7)   |

**Supplement Table S3.** General medical service use for Impingement Syndrome (M754) patients in Korea.

|                            | Impingement Syndrome (M754) |              |              |              |              |              |              |              |              |              |
|----------------------------|-----------------------------|--------------|--------------|--------------|--------------|--------------|--------------|--------------|--------------|--------------|
|                            | 2010                        | 2011         | 2012         | 2013         | 2014         | 2015         | 2016         | 2017         | 2018         | 2019         |
|                            | N (%)                       | N (%)        | N (%)        | N (%)        | N (%)        | N (%)        | N (%)        | N (%)        | N (%)        | N (%)        |
| <b>Total</b>               | 4,666(100.0)                | 5,501(100.0) | 6,607(100.0) | 7,456(100.0) | 7,612(100.0) | 8,035(100.0) | 8,675(100.0) | 8,983(100.0) | 9,340(100.0) | 9,673(100.0) |
| <b>AGE</b>                 |                             |              |              |              |              |              |              |              |              |              |
| Under 20                   | 41(0.9)                     | 43(0.8)      | 74(1.1)      | 73(1.0)      | 80(1.1)      | 81(1.0)      | 84(1.0)      | 83(0.9)      | 86(0.9)      | 89(0.9)      |
| 20-29                      | 180(3.9)                    | 175(3.2)     | 210(3.2)     | 261(3.5)     | 265(3.5)     | 290(3.6)     | 367(4.2)     | 367(4.1)     | 402(4.3)     | 413(4.3)     |
| 30-39                      | 483(10.4)                   | 517(9.4)     | 644(9.8)     | 724(9.7)     | 704(9.3)     | 754(9.4)     | 797(9.2)     | 792(8.8)     | 837(9.0)     | 894(9.2)     |
| 40-49                      | 1,126(24.1)                 | 1,321(24.0)  | 1,573(23.8)  | 1,677(22.5)  | 1,761(23.1)  | 1,853(23.1)  | 1,938(22.3)  | 1,971(21.9)  | 2,060(22.1)  | 1,980(20.5)  |
| 50-59                      | 1,420(30.4)                 | 1,718(31.2)  | 2,096(31.7)  | 2,447(32.8)  | 2,505(32.9)  | 2,538(31.6)  | 2,792(32.2)  | 2,863(31.9)  | 2,874(30.8)  | 2,999(31.0)  |
| 60-69                      | 891(19.1)                   | 1,085(19.7)  | 1,248(18.9)  | 1,396(18.7)  | 1,398(18.4)  | 1,561(19.4)  | 1,686(19.4)  | 1,843(20.5)  | 1,927(20.6)  | 2,084(21.5)  |
| 70 or older                | 525(11.3)                   | 642(11.7)    | 762(11.5)    | 878(11.8)    | 899(11.8)    | 958(11.9)    | 1,011(11.7)  | 1,064(11.8)  | 1,154(12.4)  | 1,214(12.6)  |
| <b>Gender</b>              |                             |              |              |              |              |              |              |              |              |              |
| Male                       | 2,137(45.8)                 | 2,502(45.5)  | 2,981(45.1)  | 3,529(47.3)  | 3,529(46.4)  | 3,751(46.7)  | 4,050(46.7)  | 4,297(47.8)  | 4,346(46.5)  | 4,574(47.3)  |
| Female                     | 2,529(54.2)                 | 2,999(54.5)  | 3,626(54.9)  | 3,927(52.7)  | 4,083(53.6)  | 4,284(53.3)  | 4,625(53.3)  | 4,686(52.2)  | 4,994(53.5)  | 5,099(52.7)  |
| <b>Type of visit</b>       |                             |              |              |              |              |              |              |              |              |              |
| outpatients                | 4,515(96.8)                 | 5,254(95.5)  | 6,267(94.9)  | 7,065(94.8)  | 7,126(93.6)  | 7,531(93.7)  | 8,216(94.7)  | 8,561(95.3)  | 8,886(95.1)  | 9,284(96.0)  |
| inpatients                 | 151(3.2)                    | 247(4.5)     | 340(5.2)     | 391(5.2)     | 486(6.4)     | 504(6.3)     | 459(5.3)     | 422(4.7)     | 454(4.9)     | 389(4.0)     |
| <b>Medical institution</b> |                             |              |              |              |              |              |              |              |              |              |
| Hospital                   | 1,639(35.1)                 | 2,181(39.7)  | 2,840(43.0)  | 3,355(45.0)  | 3,630(47.7)  | 3,629(45.2)  | 3,835(44.2)  | 3,877(43.2)  | 4,075(43.6)  | 3,981(41.2)  |
| Clinic                     | 2,852(61.1)                 | 3,230(58.7)  | 3,684(55.8)  | 4,055(54.4)  | 3,994(52.5)  | 4,420(55.0)  | 4,858(56.0)  | 5,157(57.4)  | 5,283(56.6)  | 5,732(59.3)  |
| KM hospital                | 13(0.3)                     | 14(0.3)      | 8(0.1)       | 17(0.2)      | 14(0.2)      | 17(0.2)      | 30(0.4)      | 16(0.2)      | 28(0.3)      | 31(0.3)      |
| KM clinic                  | 238(5.1)                    | 176(3.2)     | 226(3.4)     | 203(2.7)     | 189(2.5)     | 152(1.9)     | 183(2.1)     | 143(1.6)     | 179(1.9)     | 159(1.6)     |

**Supplement Table S4.** General medical service use for Rotator Cuff Tear or Syndrome (M751, S460) patients in Korea.

|                            | Rotator Cuff Syndrome and Tear (M751, S460) |               |               |               |               |               |               |               |               |               |
|----------------------------|---------------------------------------------|---------------|---------------|---------------|---------------|---------------|---------------|---------------|---------------|---------------|
|                            | 2010                                        | 2011          | 2012          | 2013          | 2014          | 2015          | 2016          | 2017          | 2018          | 2019          |
|                            | N (%)                                       | N (%)         | N (%)         | N (%)         | N (%)         | N (%)         | N (%)         | N (%)         | N (%)         | N (%)         |
| <b>Total</b>               | 11,390(100.0)                               | 12,220(100.0) | 13,628(100.0) | 14,601(100.0) | 15,355(100.0) | 16,023(100.0) | 16,735(100.0) | 17,683(100.0) | 19,097(100.0) | 19,994(100.0) |
| <b>AGE</b>                 |                                             |               |               |               |               |               |               |               |               |               |
| Under 20                   | 194(1.7)                                    | 168(1.4)      | 173(1.3)      | 182(1.3)      | 181(1.2)      | 178(1.1)      | 158(0.9)      | 133(0.8)      | 174(0.9)      | 154(0.8)      |
| 20-29                      | 605(5.3)                                    | 538(4.4)      | 551(4.0)      | 602(4.1)      | 610(4.0)      | 603(3.8)      | 593(3.5)      | 567(3.2)      | 594(3.1)      | 595(3.0)      |
| 30-39                      | 1,183(10.4)                                 | 1,176(9.6)    | 1,181(8.7)    | 1,170(8.0)    | 1,251(8.2)    | 1,208(7.5)    | 1,201(7.2)    | 1,171(6.6)    | 1,198(6.3)    | 1,202(6.0)    |
| 40-49                      | 2,619(23.0)                                 | 2,668(21.8)   | 2,855(21.0)   | 2,897(19.8)   | 3,043(19.8)   | 3,068(19.2)   | 3,007(18.0)   | 3,073(17.4)   | 3,302(17.3)   | 3,213(16.1)   |
| 50-59                      | 3,148(27.6)                                 | 3,585(29.3)   | 4,176(30.6)   | 4,546(31.1)   | 4,653(30.3)   | 4,885(30.5)   | 5,091(30.4)   | 5,374(30.4)   | 5,659(29.6)   | 5,842(29.2)   |
| 60-69                      | 2,246(19.7)                                 | 2,527(20.7)   | 2,782(20.4)   | 2,967(20.3)   | 3,253(21.2)   | 3,445(21.5)   | 3,866(23.1)   | 4,305(24.4)   | 4,763(24.9)   | 5,218(26.1)   |
| 70 or older                | 1,395(12.3)                                 | 1,558(12.8)   | 1,910(14.0)   | 2,237(15.3)   | 2,364(15.4)   | 2,636(16.5)   | 2,819(16.8)   | 3,060(17.3)   | 3,407(17.8)   | 3,770(18.9)   |
| <b>Gender</b>              |                                             |               |               |               |               |               |               |               |               |               |
| Male                       | 4,782(42.0)                                 | 5,254(43.0)   | 5,896(43.3)   | 6,513(44.6)   | 6,911(45.0)   | 7,312(45.6)   | 7,482(44.7)   | 8,206(46.4)   | 8,763(45.9)   | 9,177(45.9)   |
| Female                     | 6,608(58.0)                                 | 6,966(57.0)   | 7,732(56.7)   | 8,088(55.4)   | 8,444(55.0)   | 8,711(54.4)   | 9,253(55.3)   | 9,477(53.6)   | 10,334(54.1)  | 10,817(54.1)  |
| <b>Type of visit</b>       |                                             |               |               |               |               |               |               |               |               |               |
| outpatients                | 10,739(94.3)                                | 11,343(92.8)  | 12,554(92.1)  | 13,295(91.1)  | 14,002(91.2)  | 14,484(90.4)  | 15,115(90.3)  | 15,956(90.2)  | 17,313(90.7)  | 18,065(90.4)  |
| inpatients                 | 651(5.7)                                    | 877(7.2)      | 1,074(7.9)    | 1,306(8.9)    | 1,353(8.8)    | 1,539(9.6)    | 1,620(9.7)    | 1,727(9.8)    | 1,784(9.3)    | 1,929(9.7)    |
| <b>Medical institution</b> |                                             |               |               |               |               |               |               |               |               |               |
| Hospital                   | 2,356(20.7)                                 | 3,106(25.4)   | 4,093(30.0)   | 4,560(31.2)   | 4,910(32.0)   | 5,264(32.9)   | 5,889(35.2)   | 6,483(36.7)   | 7,297(38.2)   | 7,884(39.4)   |
| Clinic                     | 6,589(57.9)                                 | 7,116(58.2)   | 7,887(57.9)   | 8,644(59.2)   | 9,210(60.0)   | 9,800(61.2)   | 10,489(62.7)  | 11,076(62.6)  | 11,720(61.4)  | 12,157(60.8)  |
| KM hospital                | 18(0.2)                                     | 28(0.2)       | 50(0.4)       | 48(0.3)       | 136(0.9)      | 160(1.0)      | 180(1.1)      | 182(1.0)      | 219(1.2)      | 213(1.1)      |
| KM clinic                  | 2,859(25.1)                                 | 2,521(20.6)   | 2,348(17.2)   | 2,200(15.1)   | 2,006(13.1)   | 1,769(11.0)   | 1,265(7.6)    | 1,132(6.4)    | 1,220(6.4)    | 1,228(6.1)    |

**Supplement Table S5.** Annual non-surgical treatment prescription rate.

|                                             | 2010         | 2011         | 2012         | 2013         | 2014         | 2015         | 2016         | 2017          | 2018          | 2019          |
|---------------------------------------------|--------------|--------------|--------------|--------------|--------------|--------------|--------------|---------------|---------------|---------------|
|                                             | N (%)         | N (%)         | N (%)         |
| <b>Physical Therapy</b>                     |              |              |              |              |              |              |              |               |               |               |
| Total                                       | 75,589(41.4) | 80,858(44.1) | 94,983(47.2) | 99,370(47.5) | 99,331(47.5) | 97,102(46.7) | 96,742(46.9) | 100,107(47.5) | 101,450(46.9) | 104,224(46.5) |
| heat/cold therapy                           | 73,334(97.0) | 77,968(96.4) | 89,612(94.3) | 92,034(92.6) | 93,182(93.8) | 91,109(93.8) | 90,656(93.7) | 88,609(88.5)  | 94,558(93.2)  | 95,895(92.0)  |
| electric therapy                            | 63,532(84.0) | 67,090(83.0) | 77,530(81.6) | 81,526(82.0) | 80,355(80.9) | 76,593(78.9) | 75,492(78.0) | 77,348(77.3)  | 78,845(77.7)  | 80,208(77.0)  |
| TPI therapy                                 | 1,305(1.7)   | 1,468(1.8)   | 1,571(1.7)   | 1,644(1.7)   | 1,592(1.6)   | 1,681(1.7)   | 1,695(1.8)   | 1,824(1.8)    | 1,742(1.7)    | 1,938(1.9)    |
| exercise therapy                            | 13,794(18.2) | 15,563(19.2) | 24,785(26.1) | 24,904(25.1) | 23,698(23.9) | 23,710(24.4) | 22,778(23.5) | 24,470(24.4)  | 24,059(23.7)  | 23,120(22.2)  |
| traction therapy                            | 871(1.2)     | 897(1.1)     | 1,154(1.2)   | 1,792(1.8)   | 1,516(1.5)   | 1,643(1.7)   | 1,769(1.8)   | 2,145(2.1)    | 2,480(2.4)    | 2,627(2.5)    |
| paraffin bath                               | 701(0.9)     | 579(0.7)     | 709(0.7)     | 578(0.6)     | 757(0.8)     | 690(0.7)     | 804(0.8)     | 868(0.9)      | 741(0.7)      | 965(0.9)      |
| laser therapy                               | 6,434(8.5)   | 6,834(8.5)   | 9,000(9.5)   | 9,359(9.4)   | 9,367(9.4)   | 10,690(11.0) | 11,734(12.1) | 12,963(12.9)  | 13,960(13.8)  | 15,763(15.1)  |
| others                                      | 136(0.2)     | 167(0.2)     | 298(0.3)     | 264(0.3)     | 327(0.3)     | 308(0.3)     | 225(0.2)     | 230(0.2)      | 444(0.4)      | 577(0.6)      |
| <b>Injection</b>                            |              |              |              |              |              |              |              |               |               |               |
| Total                                       | 37,740(20.7) | 38,424(21.0) | 40,959(20.3) | 39,769(19.0) | 38,839(18.6) | 38,648(18.6) | 38,087(18.4) | 38,554(18.3)  | 40,064(18.5)  | 40,330(18.0)  |
| SC or IM Injection                          | 30,170(79.9) | 28,888(75.2) | 28,351(69.2) | 26,238(66.0) | 24,748(63.7) | 23,190(60.0) | 22,480(59.0) | 21,464(55.7)  | 21,715(54.2)  | 19,746(49.0)  |
| IV Injection                                | 1,577(4.2)   | 2,014(5.2)   | 2,406(5.9)   | 2,787(7.0)   | 3,151(8.1)   | 3,400(8.8)   | 3,341(8.8)   | 3,462(9.0)    | 3,677(9.2)    | 3,773(9.4)    |
| Intraarticular Injection                    | 5,950(15.8)  | 7,623(19.8)  | 10,106(24.7) | 10,848(27.3) | 11,156(28.7) | 12,292(31.8) | 12,684(33.3) | 13,723(35.6)  | 14,581(36.4)  | 16,053(39.8)  |
| Perineural Injection                        | 8(0.0)       | 2(0.0)       | -            | -            | -            | 1(0.0)       | -            | 1(0.0)        | -             | -             |
| Others                                      | 2,031(5.4)   | 2,223(5.8)   | 2,752(6.7)   | 2,802(7.0)   | 2,912(7.5)   | 3,169(8.2)   | 3,072(8.1)   | 3,270(8.5)    | 3,535(8.8)    | 4,074(10.1)   |
| <b>Nerve block</b>                          |              |              |              |              |              |              |              |               |               |               |
| Total                                       | 18,236(10.0) | 20,448(11.2) | 23,021(11.4) | 25,926(12.4) | 26,888(12.9) | 29,300(14.1) | 30,700(14.9) | 35,623(16.9)  | 36,880(17.1)  | 39,634(17.7)  |
| Peripheral Branch Block, Scapular Nerve     | 16,346(89.6) | 18,409(90.0) | 20,585(89.4) | 23,056(88.9) | 23,999(89.3) | 26,074(89.0) | 26,878(87.6) | 30,576(85.8)  | 30,998(84.1)  | 33,289(84.0)  |
| Peripheral Branch Block, Axillary Nerve     | 2,799(15.3)  | 3,239(15.8)  | 4,378(19.0)  | 5,252(20.3)  | 5,418(20.2)  | 6,089(20.8)  | 7,453(24.3)  | 9,335(26.2)   | 10,270(27.8)  | 11,963(30.2)  |
| Peripheral Branch Block, Others             | 959(5.3)     | 998(4.9)     | 1,090(4.7)   | 1,205(4.6)   | 1,245(4.6)   | 1,378(4.7)   | 1,502(4.9)   | 1,664(4.7)    | 1,794(4.9)    | 2,024(5.1)    |
| Spinal Nerve Plexus, Root or Ganglion Block | 178(1.0)     | 265(1.3)     | 288(1.3)     | 515(2.0)     | 650(2.4)     | 934(3.2)     | 1,072(3.5)   | 1,498(4.2)    | 1,941(5.3)    | 2,664(6.7)    |
| Epidural Block                              | 294(1.6)     | 332(1.6)     | 529(2.3)     | 567(2.2)     | 641(2.4)     | 828(2.8)     | 757(2.5)     | 601(1.7)      | 754(2.0)      | 756(1.9)      |
| Others                                      | 80(0.4)      | 77(0.4)      | 49(0.2)      | 93(0.4)      | 157(0.6)     | 157(0.5)     | 137(0.4)     | 1,308(3.7)    | 1,554(4.2)    | 1,637(4.1)    |

|                                           |              |              |              |              |              |              |              |              |              |              |
|-------------------------------------------|--------------|--------------|--------------|--------------|--------------|--------------|--------------|--------------|--------------|--------------|
| <b>Other nonsurgical procedure</b>        |              |              |              |              |              |              |              |              |              |              |
| Total                                     | 96(0.1)      | 122(0.1)     | 121(0.1)     | 147(0.1)     | 143(0.1)     | 163(0.1)     | 181(0.1)     | 222(0.1)     | 218(0.1)     | 247(0.1)     |
| Brisement Force                           | 82(85.4)     | 118(96.7)    | 114(94.2)    | 134(91.2)    | 137(95.8)    | 158(96.9)    | 170(93.9)    | 211(95.0)    | 211(96.8)    | 241(97.6)    |
| Closed Reduction of Dislocation, Shoulder | 4(4.2)       | -            | 1(0.8)       | 4(2.7)       | 2(1.4)       | 1(0.6)       | 4(2.2)       | 3(1.4)       | 2(0.9)       | 3(1.2)       |
| Closed Reduction and Immobilization       | 10(10.4)     | 4(3.3)       | 6(5.0)       | 9(6.1)       | 5(3.5)       | 4(2.5)       | 8(4.4)       | 8(3.6)       | 5(2.3)       | 3(1.2)       |
| <b>Korean Medical Therapy</b>             |              |              |              |              |              |              |              |              |              |              |
| Total                                     | 60,997(33.4) | 50,593(27.6) | 43,449(21.6) | 43,229(20.7) | 40,685(19.5) | 37,588(18.1) | 32,059(15.5) | 27,675(13.1) | 27,658(12.8) | 25,609(11.4) |
| Acupuncture, general                      | 60,526(99.2) | 49,525(97.9) | 42,751(98.4) | 42,107(97.4) | 39,533(97.2) | 37,014(98.5) | 30,702(95.8) | 27,051(97.7) | 27,009(97.7) | 25,167(98.3) |
| Acupuncture, special                      |              |              |              |              |              |              |              |              |              |              |
| Intraarticular                            | 33,923(55.6) | 29,874(59.0) | 24,513(56.4) | 20,967(48.5) | 18,537(45.6) | 18,767(49.9) | 13,435(41.9) | 11,134(40.2) | 11,805(42.7) | 10,055(39.3) |
| Intraperitoneum                           | 265(0.4)     | 490(1.0)     | 203(0.5)     | 244(0.6)     | 413(1.0)     | 345(0.9)     | 341(1.1)     | 312(1.1)     | 322(1.2)     | 279(1.1)     |
| Intervertebral                            | 2,336(3.8)   | 1,560(3.1)   | 1,867(4.3)   | 3,070(7.1)   | 2,359(5.8)   | 1,866(5.0)   | 2,866(8.9)   | 3,069(11.1)  | 2,643(9.6)   | 2,565(10.0)  |
| Piercing, multidirectional                | 20,808(34.1) | 15,917(31.5) | 14,112(32.5) | 16,057(37.1) | 16,468(40.5) | 13,539(36.0) | 12,263(38.3) | 10,692(38.6) | 11,828(42.8) | 11,974(46.8) |
| Intraorbital                              | 36(0.1)      | 1(0.0)       | 1(0.0)       | 9(0.0)       | 36(0.1)      | 1(0.0)       | -            | 10(0.0)      | 10(0.0)      | -            |
| Intranasal                                | 24(0.0)      | 29(0.1)      | 14(0.0)      | 43(0.1)      | 21(0.1)      | 38(0.1)      | 5(0.0)       | 26(0.1)      | 52(0.2)      | 6(0.0)       |
| others                                    | 397(0.7)     | 432(0.9)     | 298(0.7)     | 117(0.3)     | 94(0.2)      | 79(0.2)      | 70(0.2)      | 75(0.3)      | 168(0.6)     | 62(0.2)      |
| Electroacupuncture                        | 8,926(14.6)  | 8,748(17.3)  | 7,437(17.1)  | 8,226(19.0)  | 8,316(20.4)  | 8,327(22.2)  | 7,699(24.0)  | 7,291(26.3)  | 9,173(33.2)  | 8,282(32.3)  |
| Moxibustion                               |              |              |              |              |              |              |              |              |              |              |
| Direct                                    | 959(1.6)     | 1,117(2.2)   | 882(2.0)     | 1,054(2.4)   | 1,030(2.5)   | 996(2.6)     | 920(2.9)     | 942(3.4)     | 877(3.2)     | 650(2.5)     |
| Indirect                                  | 9,223(15.1)  | 8,372(16.5)  | 7,305(16.8)  | 6,161(14.3)  | 5,712(14.0)  | 4,842(12.9)  | 5,269(16.4)  | 4,681(16.9)  | 5,382(19.5)  | 4,829(18.9)  |
| Cupping therapy                           |              |              |              |              |              |              |              |              |              |              |
| Dry                                       | 12,300(20.2) | 11,023(21.8) | 10,785(24.8) | 10,854(25.1) | 11,260(27.7) | 9,023(24.0)  | 9,611(30.0)  | 6,578(23.8)  | 7,744(28.0)  | 8,682(33.9)  |
| Wet                                       | 15,694(25.7) | 13,063(25.8) | 10,399(23.9) | 10,190(23.6) | 9,865(24.2)  | 8,623(22.9)  | 7,773(24.2)  | 7,197(26.0)  | 7,747(28.0)  | 7,069(27.6)  |
| Warm/cold therapy                         | 27,377(44.9) | 24,726(48.9) | 21,553(49.6) | 19,965(46.2) | 18,852(46.3) | 16,604(44.2) | 16,439(51.3) | 13,609(49.2) | 14,312(51.7) | 13,144(51.3) |

**Supplement Table S6.** Annual medication prescription rate.

|                                   | 2010         | 2011         | 2012         | 2013         | 2014         | 2015          | 2016          | 2017          | 2018          | 2019          |
|-----------------------------------|--------------|--------------|--------------|--------------|--------------|---------------|---------------|---------------|---------------|---------------|
|                                   | N (%)         | N (%)         | N (%)         | N (%)         | N (%)         |
| Total                             | 79,948(43.7) | 86,011(47.0) | 95,968(47.6) | 99,393(47.5) | 99,637(47.6) | 101,251(48.7) | 104,042(50.4) | 110,209(52.3) | 112,761(52.2) | 117,586(52.4) |
| Opioids                           | 6,549(8.2)   | 14,240(16.6) | 17,130(17.8) | 19,407(19.5) | 19,045(19.1) | 19,741(19.5)  | 23,557(22.6)  | 29,623(26.9)  | 30,037(26.6)  | 32,170(27.4)  |
| Non-Opioid Pain Relief Medication |              |              |              |              |              |               |               |               |               |               |
| NSAIDS                            | 47,778(59.8) | 52,999(61.6) | 59,842(62.4) | 61,943(62.3) | 62,551(62.8) | 64,629(63.8)  | 69,221(66.5)  | 76,480(69.4)  | 78,897(70.0)  | 82,509(70.2)  |
| Etc                               | 1,672(2.1)   | 1,721(2.0)   | 2,181(2.3)   | 2,287(2.3)   | 2,253(2.3)   | 2,199(2.2)    | 6,501(6.2)    | 7,025(6.4)    | 7,868(7.0)    | 8,666(7.4)    |
| Neuralgia medication              | 135(0.2)     | 175(0.2)     | 165(0.2)     | 159(0.2)     | 124(0.1)     | 78(0.1)       | 80(0.1)       | 148(0.1)      | 106(0.1)      | 141(0.1)      |
| Muscle relaxants                  | 26,951(33.7) | 28,070(32.6) | 31,142(32.5) | 31,937(32.1) | 30,952(31.1) | 31,523(31.1)  | 33,788(32.5)  | 36,350(33.0)  | 38,064(33.8)  | 43,512(37.0)  |
| Anesthetic                        | 423(0.5)     | 546(0.6)     | 582(0.6)     | 483(0.5)     | 871(0.9)     | 1,162(1.1)    | 14,856(14.3)  | 36,647(33.3)  | 38,675(34.3)  | 41,889(35.6)  |
| Gastrointestinal                  | 41,431(51.8) | 49,046(57.0) | 60,844(63.4) | 64,430(64.8) | 64,233(64.5) | 66,152(65.3)  | 68,361(65.7)  | 72,988(66.2)  | 74,840(66.4)  | 77,979(66.3)  |
| Antipsychotic                     | 7,038(8.8)   | 7,120(8.3)   | 6,842(7.1)   | 6,933(7.0)   | 6,545(6.6)   | 6,753(6.7)    | 6,197(6.0)    | 6,688(6.1)    | 6,167(5.5)    | 6,424(5.5)    |
| Antibiotics                       |              |              |              |              |              |               |               |               |               |               |
| Topical                           | 5(0.0)       | 8(0.0)       | 8(0.0)       | 10(0.0)      | 1(0.0)       | 13(0.0)       | 109(0.1)      | 199(0.2)      | 201(0.2)      | 235(0.2)      |
| Systemic                          | 2,483(3.1)   | 2,776(3.2)   | 3,159(3.3)   | 3,386(3.4)   | 3,410(3.4)   | 3,465(3.4)    | 3,436(3.3)    | 3,626(3.3)    | 3,736(3.3)    | 3,704(3.2)    |
| Steroids                          |              |              |              |              |              |               |               |               |               |               |
| Topical                           | -            | -            | -            | -            | -            | -             | 137(0.1)      | 321(0.3)      | 369(0.3)      | 350(0.3)      |
| Systemic                          | 2,094(2.6)   | 2,696(3.1)   | 3,112(3.2)   | 3,828(3.9)   | 3,569(3.6)   | 4,097(4.0)    | 13,608(13.1)  | 25,991(23.6)  | 28,213(25.0)  | 29,847(25.4)  |
| Others                            | 70,238(87.9) | 72,317(84.1) | 77,719(81.0) | 80,019(80.5) | 80,290(80.6) | 81,580(80.6)  | 68,244(65.6)  | 54,160(49.1)  | 55,083(48.8)  | 41,346(35.2)  |

**Supplement Table S7.** Annual surgical treatment prescription rate.

|                                                                  | 2010      | 2011      | 2012        | 2013        | 2014        | 2015        | 2016        | 2017        | 2018        | 2019        |
|------------------------------------------------------------------|-----------|-----------|-------------|-------------|-------------|-------------|-------------|-------------|-------------|-------------|
|                                                                  | N (%)     | N (%)     | N (%)       | N (%)       | N (%)       | N (%)       | N (%)       | N (%)       | N (%)       | N (%)       |
| Total                                                            | 718(0.4)  | 980(0.5)  | 1,217(0.6)  | 1,374(0.7)  | 1,412(0.7)  | 1,498(0.7)  | 1,483(0.7)  | 1,594(0.8)  | 1,638(0.8)  | 1,721(0.8)  |
| Acromioplasty and<br>Repair of Ruptured<br>Shoulder Rotator Cuff | 652(90.8) | 920(93.9) | 1,163(95.6) | 1,284(93.4) | 1,334(94.5) | 1,419(94.7) | 1,384(93.3) | 1,465(91.9) | 1,491(91.0) | 1,513(87.9) |
| Reconstruction of<br>Tendon and Ligament                         | 51(7.1)   | 58(5.9)   | 63(5.2)     | 77(5.6)     | 73(5.2)     | 85(5.7)     | 73(4.9)     | 95(6.0)     | 105(6.4)    | 88(5.1)     |
| Excision of Joint,<br>Shoulder                                   | 33(4.6)   | 36(3.7)   | 35(2.9)     | 43(3.1)     | 49(3.5)     | 53(3.5)     | 60(4.0)     | 101(6.3)    | 120(7.3)    | 135(7.8)    |
| Excision of Joint, Others                                        | -         | 2(0.2)    | 5(0.4)      | 2(0.1)      | 3(0.2)      | 4(0.3)      | 2(0.1)      | 5(0.3)      | 10(0.6)     | 6(0.3)      |
| Replacement<br>Arthroplasty ,<br>Shoulder                        | 4(0.6)    | 8(0.8)    | 12(1.0)     | 20(1.5)     | 11(0.8)     | 22(1.5)     | 33(2.2)     | 29(1.8)     | 27(1.6)     | 52(3.0)     |
| Removal of Implant for<br>Internal Fixation                      | 3(0.4)    | 4(0.4)    | 4(0.3)      | 10(0.7)     | 8(0.6)      | 1(0.1)      | 9(0.6)      | 6(0.4)      | 8(0.5)      | 7(0.4)      |
| Open Reduction of<br>Dislocation                                 | -         | -         | -           | -           | -           | -           | -           | 1(0.1)      | 1(0.1)      | -           |
| Others                                                           | 67(9.3)   | 63(6.4)   | 58(4.8)     | 74(5.4)     | 77(5.5)     | 90(6.0)     | 72(4.9)     | 74(4.6)     | 59(3.6)     | 98(5.7)     |



**Supplement Table S8.** Annual surgery rate for rotator cuff syndrome or tear (M751, S460).

|                                                                  | 2010      | 2011      | 2012      | 2013        | 2014        | 2015        | 2016        | 2017        | 2018        | 2019        |
|------------------------------------------------------------------|-----------|-----------|-----------|-------------|-------------|-------------|-------------|-------------|-------------|-------------|
|                                                                  | N (%)     | N (%)     | N (%)     | N (%)       | N (%)       | N (%)       | N (%)       | N (%)       | N (%)       | N (%)       |
| Total                                                            | 554(1.3)  | 722(1.4)  | 908(1.4)  | 1,054(1.5)  | 1,033(1.4)  | 1,135(1.5)  | 1,158(1.5)  | 1,286(1.5)  | 1,314(1.5)  | 1,409(1.5)  |
| Acromioplasty and<br>Repair of Ruptured<br>Shoulder Rotator Cuff | 527(95.1) | 698(96.7) | 873(96.1) | 1,007(95.5) | 1,002(97.0) | 1,087(95.8) | 1,093(94.4) | 1,206(93.8) | 1,238(94.2) | 1,281(90.9) |
| Reconstruction of<br>Tendon and Ligament                         | 40(7.2)   | 43(6.0)   | 52(5.7)   | 67(6.4)     | 59(5.7)     | 67(5.9)     | 65(5.6)     | 79(6.1)     | 83(6.3)     | 76(5.4)     |
| Excision of Joint,<br>Shoulder                                   | 16(2.9)   | 22(3.0)   | 22(2.4)   | 19(1.8)     | 25(2.4)     | 27(2.4)     | 35(3.0)     | 59(4.6)     | 54(4.1)     | 69(4.9)     |
| Excision of Joint, Others                                        | -         | 1(0.1)    | 4(0.4)    | 1(0.1)      | 3(0.3)      | 2(0.2)      | 2(0.2)      | 5(0.4)      | 5(0.4)      | 5(0.4)      |
| Replacement<br>Arthroplasty ,<br>Shoulder                        | 3(0.5)    | 8(1.1)    | 12(1.3)   | 20(1.9)     | 11(1.1)     | 20(1.8)     | 33(2.8)     | 29(2.3)     | 27(2.1)     | 52(3.7)     |
| Removal of Implant<br>for Internal Fixation                      | 3(0.5)    | 1(0.1)    | 3(0.3)    | 8(0.8)      | 5(0.5)      | 1(0.1)      | 5(0.4)      | 5(0.4)      | 6(0.5)      | 5(0.4)      |
| Open Reduction of<br>Dislocation                                 | -         | -         | -         | -           | -           | -           | -           | 1(0.1)      | 1(0.1)      | -           |
| Others                                                           | 31(5.6)   | 36(5.0)   | 42(4.6)   | 45(4.3)     | 39(3.8)     | 53(4.7)     | 46(4.0)     | 49(3.8)     | 35(2.7)     | 68(4.8)     |

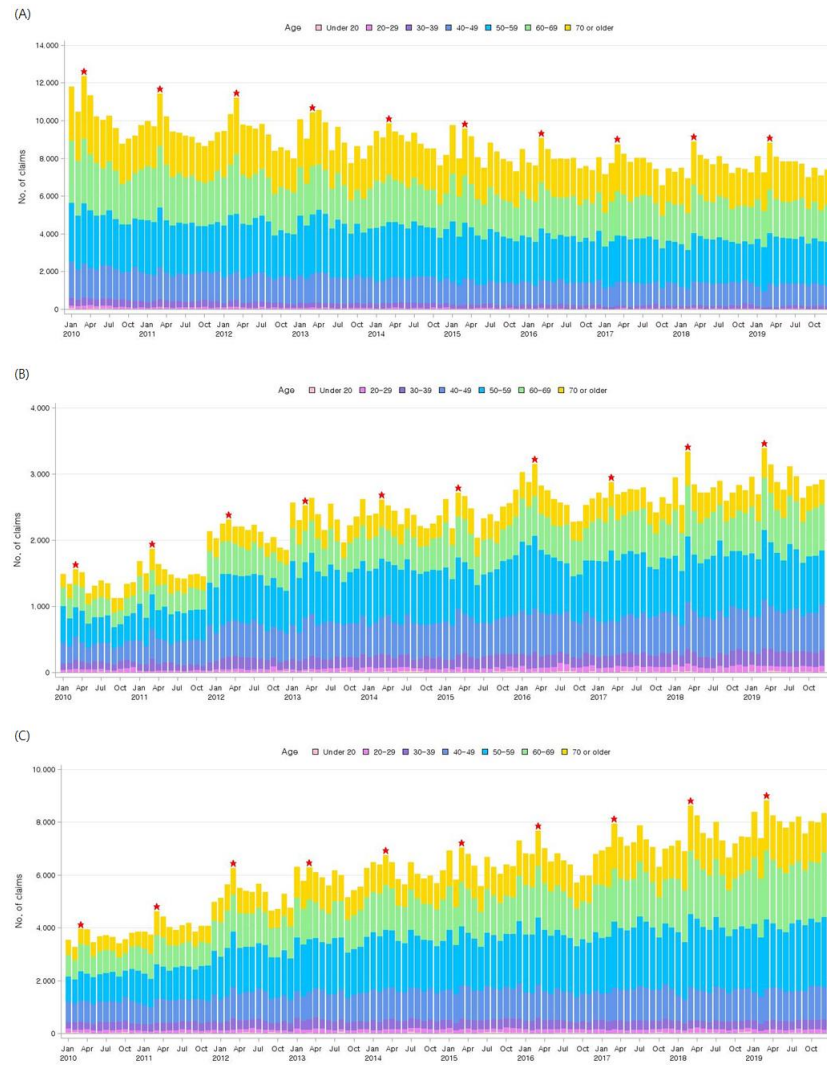

**Figure S1.** Ten-year (2010–2019) trend on monthly claims of medical services for shoulder disorders by age group. (A) adhesive capsulitis, (B) impingement syndrome, (C) rotator cuff syndrome or tear. Asterisk means March in each year.
